# Supplementary material for: Ab initio study of metal carbide hydrides in the 2.25Cr1Mo0.25V steel
Source: Royal Society of Chemistry journal article supplement (doi:10.1039/d0cp04833j), 2021-01-01
Supplement: d0cp04833j1.pdf [file d0cp04833j1.pdf]

## Ab initio study of metal carbide hydrides in 2.25Cr1Mo0.25V steel

Min He,<sup>a</sup> Chidozie Onwudinanti,<sup>b</sup> Yaoting Zheng,<sup>c</sup> Xiaomei Wu,<sup>a</sup> Zaoxiao Zhang<sup>\*a</sup> and Shuxia Tao<sup>\*d</sup>

---

<sup>a</sup> State Key Laboratory of Multiphase Flow in Power Engineering, School of Chemical Engineering and Technology, Xi'an Jiaotong University, No.28, Xianning West Road, Xi'an, Shaanxi, 710049, P.R. China. E-mail: zhangzx@xjtu.edu.cn

<sup>b</sup> Center for Computational Energy Research, DIFFER - Dutch Institute for Fundamental Energy Research De Zaale 20, 5612AJ Eindhoven, The Netherlands.

<sup>c</sup> School of science, Xi'an University of Architecture and Technology, No.13, Yanta Road, Xi'an Shaanxi, 710055, P.R. China.

<sup>d</sup> Center for Computational Energy Research, Department of Applied Physics, Eindhoven University of Technology, P.O. Box 513, 5600MB Eindhoven, The Netherlands. E-mail: s.x.tao@tue.nl

Table S 1 Basic calculation parameters and per atom energy of metal-carbon systems.

|                                 | Space group          | Lattice parameters [Å] | $E_{\text{cut}}$ [eV] | K-mesh   | $E_{\text{M}}$ [eV] | $\Delta E_{\text{f}}$ [eV] |
|---------------------------------|----------------------|------------------------|-----------------------|----------|---------------------|----------------------------|
| C(diamond)                      | Fd3m                 | 2.53×2.53×2.53         | 500                   | 8×8×8    | -9.09               |                            |
| C(graphite)                     | P6 <sub>3</sub> /mmc | 2.47×2.47×7.91         | 500                   | 8×8×2    | -9.22               |                            |
| Cr                              | Im3m                 | 2.85×2.85×2.85         | 500                   | 8×8×8    | -9.51               |                            |
| Mo                              | Im3m                 | 3.16×3.16×3.16         | 400                   | 10×10×10 | -10.92              |                            |
| V                               | Im3m                 | 3.00×3.00×3.00         | 500                   | 10×10×10 | -8.96               |                            |
| Cr <sub>23</sub> C <sub>6</sub> | Fm $\bar{3}$ m       | 10.54×10.54×10.54      | 700                   | 2×2×2    |                     | -0.09                      |
| Cr <sub>7</sub> C <sub>3</sub>  | Pnma                 | 4.50×6.88×12.09        | 700                   | 5×3×2    |                     | -0.16                      |
| Cr <sub>7</sub> C <sub>3</sub>  | P6 <sub>3</sub> mc   | 13.87×13.87×4.49       | 700                   | 2×2×10   |                     | -0.12                      |
| CrC                             | Fm $\bar{3}$ m       | 4.06×4.06×4.06         | 450                   | 8×8×8    |                     | 0.17                       |
| Mo <sub>2</sub> C               | Pbcn                 | 4.74×6.06×5.22         | 800                   | 12×12×12 |                     | -0.15                      |
| MoC                             | P $\bar{6}$ m2       | 2.92×2.92×2.82         | 800                   | 9×9×9    |                     | -0.13                      |
| MoC                             | Fm $\bar{3}$ m       | 4.37×4.37×4.37         | 500                   | 8×8×8    |                     | 0.16                       |
| V <sub>2</sub> C                | P6 <sub>3</sub> /mmc | 2.89×2.89×4.53         | 450                   | 10×10×5  |                     | -0.46                      |
| V <sub>2</sub> C                | Pbcn                 | 4.55×5.73×5.04         | 450                   | 8×8×8    |                     | -0.48                      |
| V <sub>3</sub> C <sub>2</sub>   | R $\bar{3}$ m        | 2.92×2.92×27.80        | 450                   | 8×8×1    |                     | -0.41                      |
| V <sub>4</sub> C <sub>3</sub>   | Fm $\bar{3}$ m       | 4.12×4.12×4.12         | 500                   | 8×8×8    |                     | -0.34                      |
| V <sub>6</sub> C <sub>5</sub>   | P3 <sub>1</sub> 12   | 5.10×5.10×14.36        | 500                   | 10×10×2  |                     | -0.55                      |
| V <sub>6</sub> C <sub>7</sub>   | P4 <sub>1</sub> 32   | 8.34×8.34×8.34         | 500                   | 6×6×6    |                     | -0.53                      |
| VC                              | Fm $\bar{3}$ m       | 4.16×4.16×4.16         | 500                   | 8×8×8    |                     | -0.41                      |

Table S 2 The formation enthalpies and hydrogen formation enthalpies of metal carbides in the original, compressed and tense lattices.

| Stress     | $\Delta E_{\text{f}}$ [eV]     |                   |                               | $\Delta E_{\text{H}}$ [eV]                       |                                     |                                                 |
|------------|--------------------------------|-------------------|-------------------------------|--------------------------------------------------|-------------------------------------|-------------------------------------------------|
|            | Cr <sub>7</sub> C <sub>3</sub> | Mo <sub>2</sub> C | V <sub>6</sub> C <sub>5</sub> | (Cr <sub>7</sub> C <sub>3</sub> ) <sub>4</sub> H | (Mo <sub>2</sub> C) <sub>16</sub> H | (V <sub>6</sub> C <sub>5</sub> ) <sub>3</sub> H |
| Origin     | -0.163                         | -0.150            | -0.548                        | 0.496                                            | 0.146                               | -0.131                                          |
| Compressed | 0.161                          | 0.160             | -0.350                        | 1.314                                            | 0.602                               | -0.041                                          |
| Tense      | 0.061                          | 0.060             | -0.412                        | -0.091                                           | -0.131                              | -0.081                                          |

Above we report the results of calculations to study the effect of strain on metal carbide hydrogen absorption, in Table S2. The original structure is the relaxed lattice structure, the compressed structure has a lattice constant 95% of the original, and the tensile structure is extended to 105%. It can be observed that the strain raises the formation enthalpy for the carbides; both compression and tension change the formation enthalpy of Cr<sub>7</sub>C<sub>3</sub> and Mo<sub>2</sub>C from negative to positive, while that of V<sub>6</sub>C<sub>5</sub> remains negative, albeit higher.

The hydride formation enthalpies of all three metal carbides increase in the compressed state, with V<sub>6</sub>C<sub>5</sub> hydride maintaining a (slightly) negative formation energy. Cr<sub>7</sub>C<sub>3</sub> and Mo<sub>2</sub>C hydride formation energies decrease to negative values in tense state. Notably the case for V<sub>6</sub>C<sub>5</sub> is the opposite, although the formation energy remains negative despite its rise. The conclusion is that compressive strain will decrease both the stability and the hydrogen absorption ability of the metal carbides, while tensile strain

will decrease the stability of metal carbides, but increase hydrogen absorption ability of the metal carbides in the alloy, with the exception of vanadium carbide.
